# Supplementary material
Source: MDPI journal article supplement (https://www.mdpi.com/2076-3417/11/16/7380)
Supplement: s1 [file s1]

Archive with 2 entries (2 files):
- supplementary material 1.pdf
- supplementary material 2.pdf
