# Supplementary material
Source: MDPI journal article supplement (https://www.mdpi.com/2076-3417/11/16/7380)
Supplement: s1 [file s1]

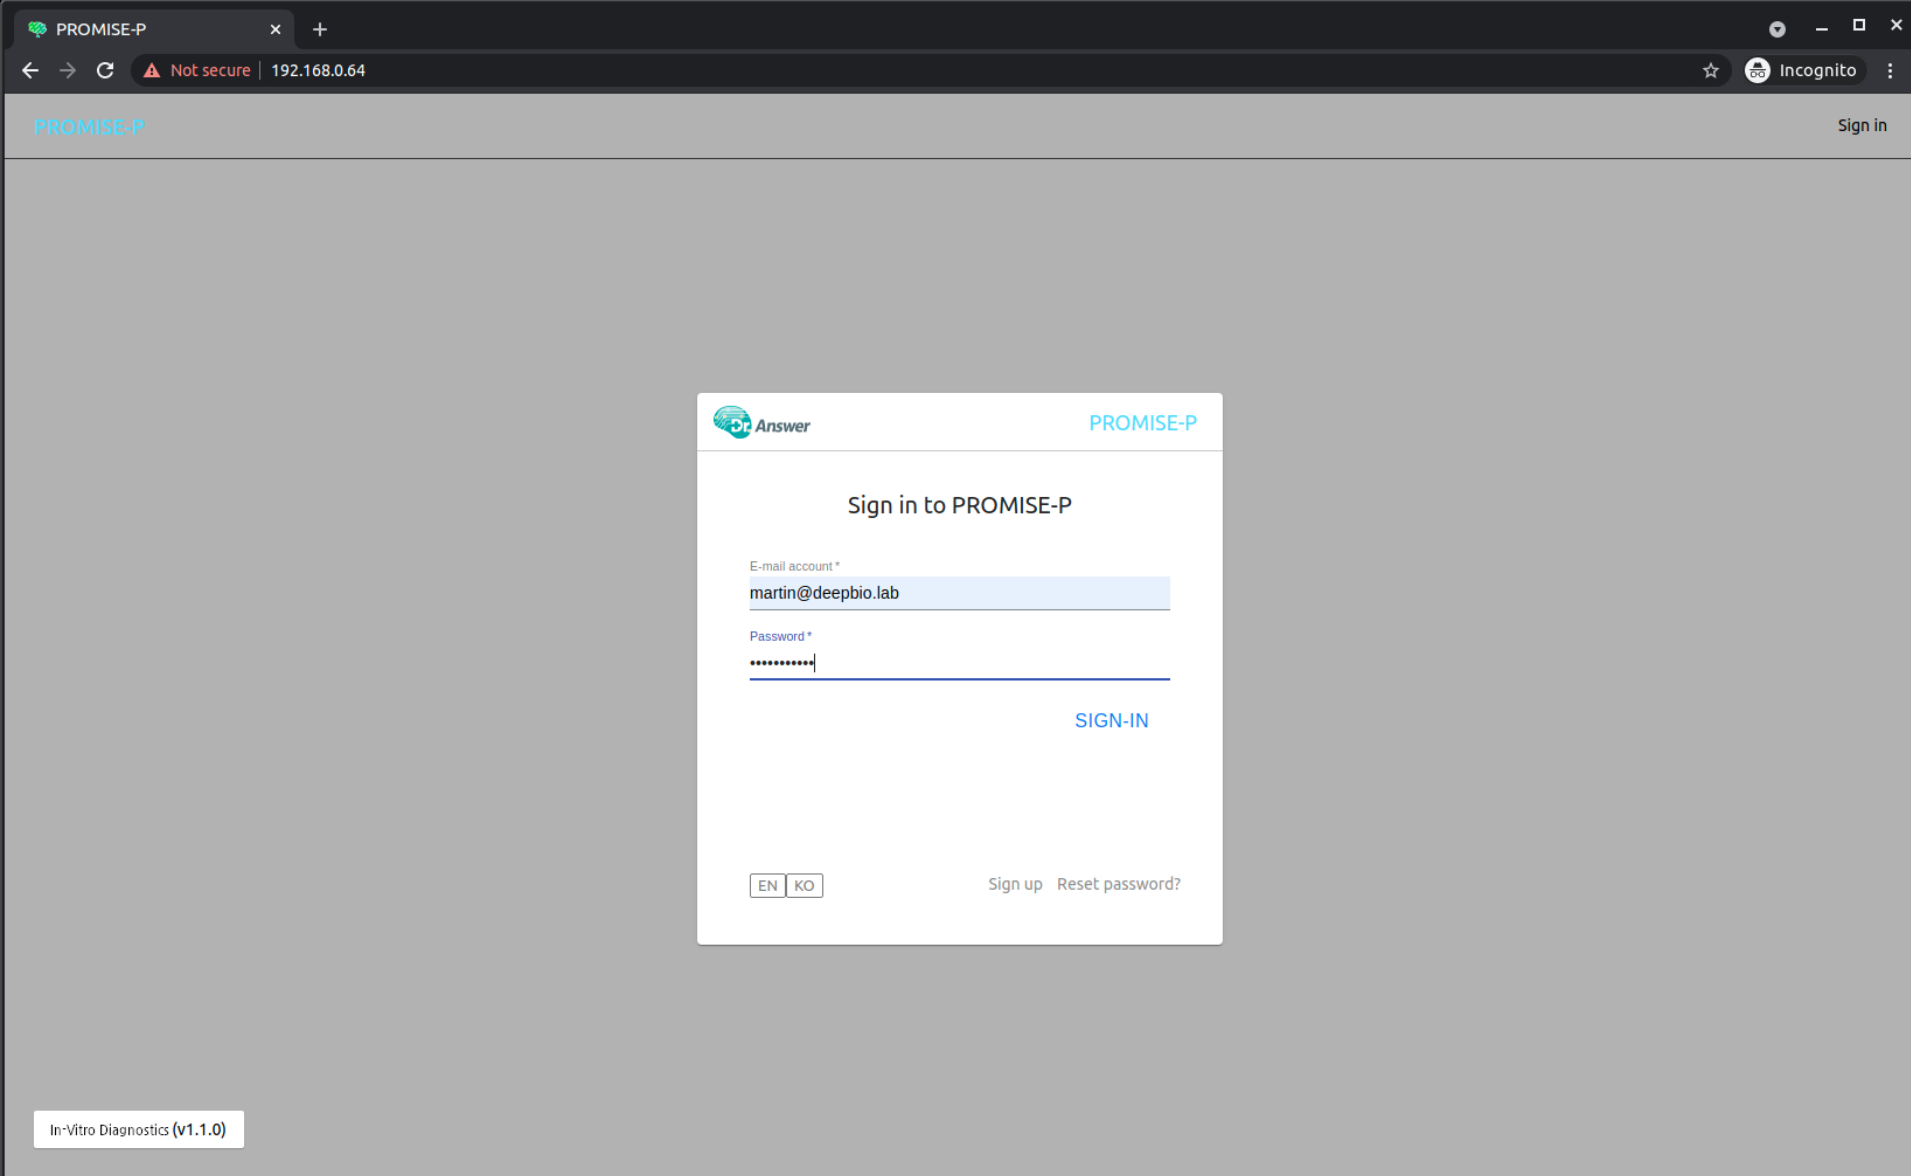

1) The sign-in modal of PROMISE-P. Only registered users can access the software.

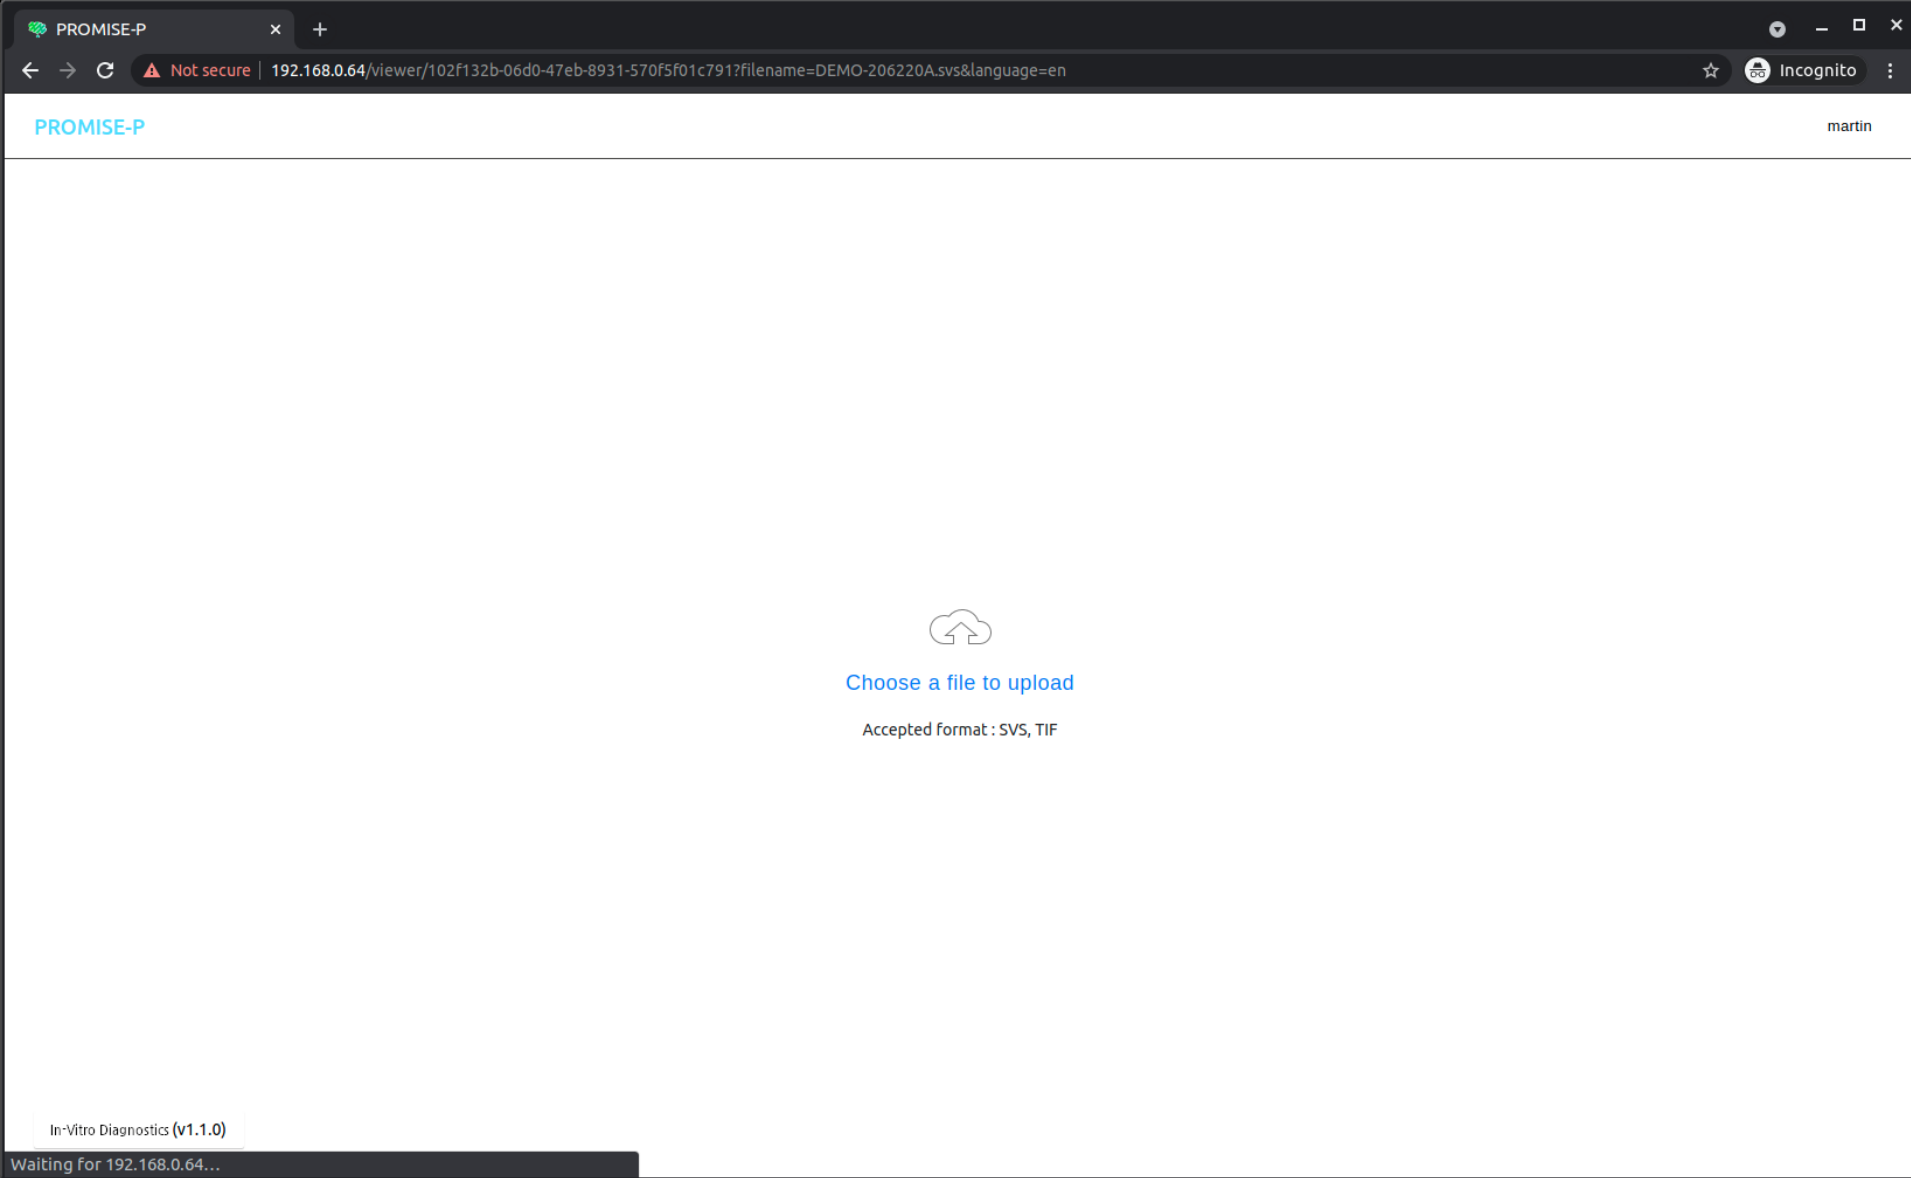

2) After sign-in, users can upload the whole-slide image file of prostate needle biopsy.

PROMISE-P x +

Not secure | 192.168.0.64/viewer/102f132b-06d0-47eb-8931-570f5f01c791?filename=DEMO-206220A.svs&language=en

Incognito

PROMISE-P 100% + - [Navigation Icons] DEMO-206220A.svs 8X martin

Analysis [Eye Icon]

Image size : 85656 x 18994  
File size : 201MB  
File format : svs  
MPP : 0.3

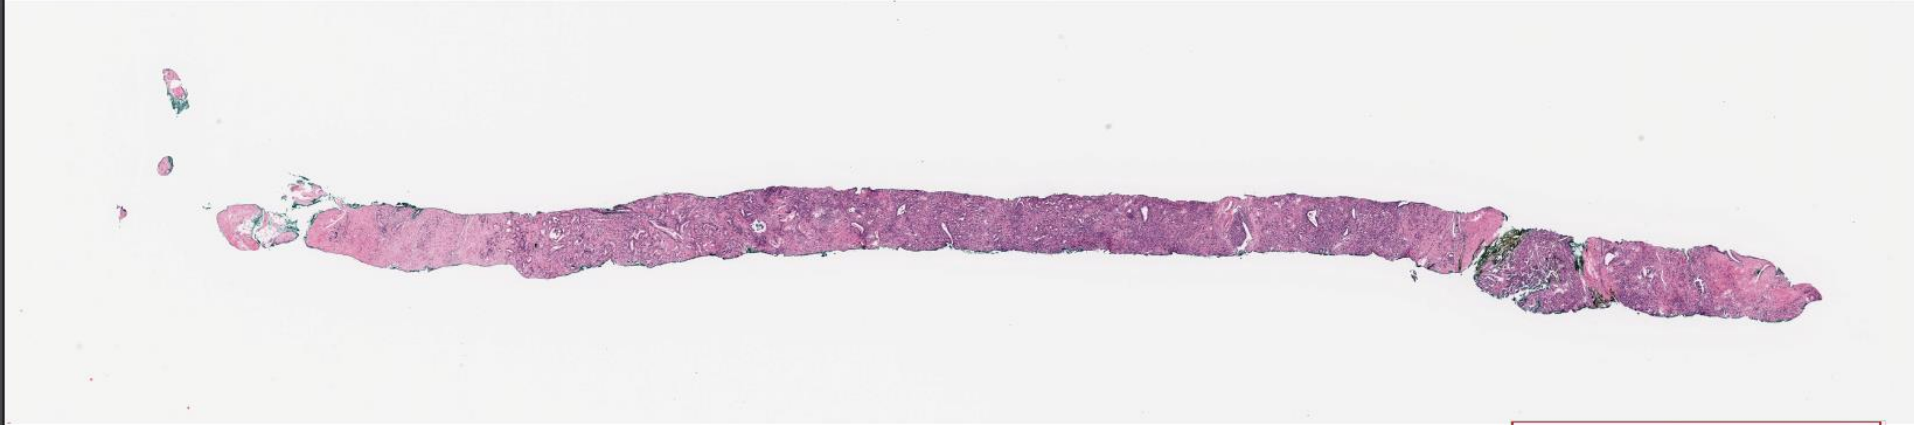

+ -



In-Vitro Diagnostics (v1.1.0)

1326µm

3) Users can read the slide image via the slide viewer. The image file information and the mini-map are also provided.

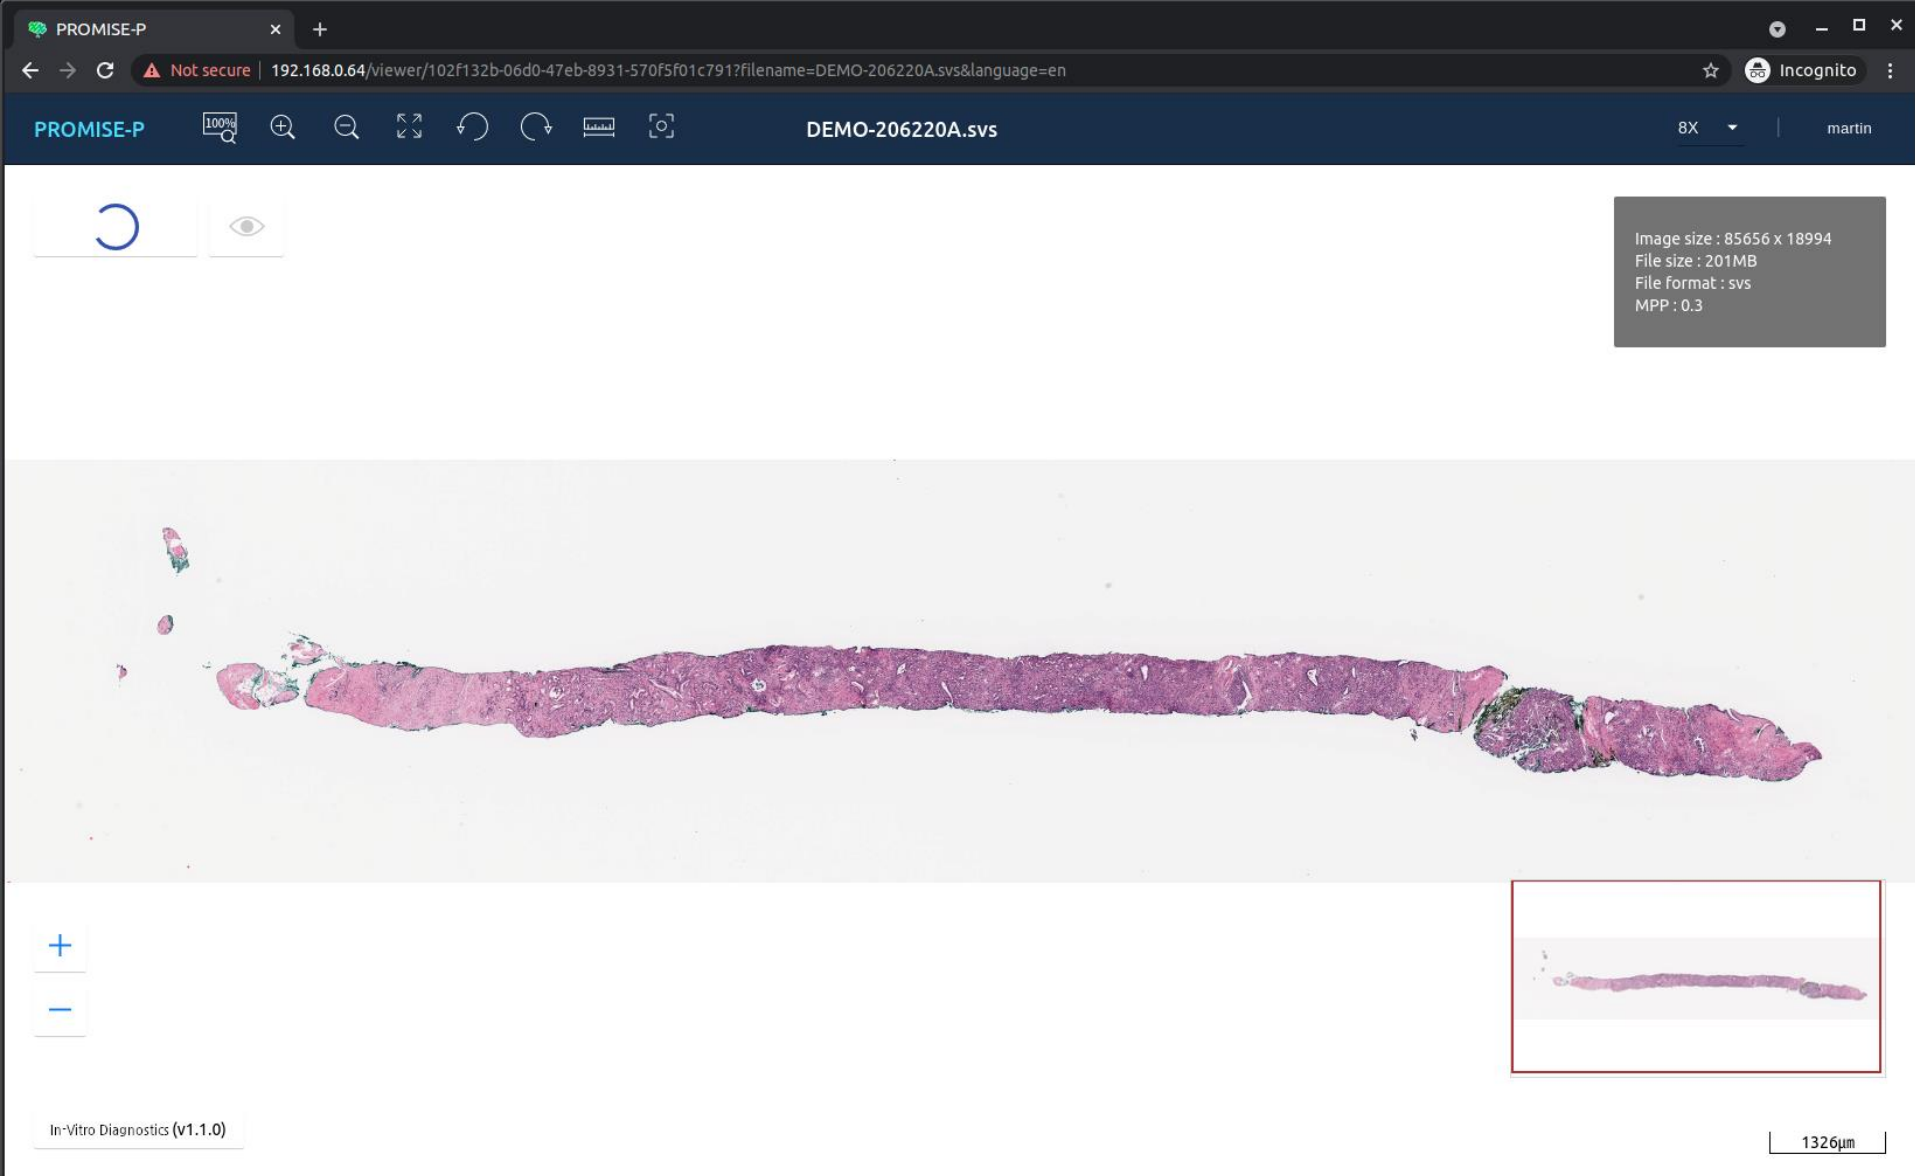

4) When clicking the upper-left 'Analysis' button, the software automatically analyzes the image to detect cancer lesions.

PROMISE-P x +

Not secure | 192.168.0.64/viewer/102f132b-06d0-47eb-8931-570f5f01c791?filename=DEMO-206220A.svs&language=en

Incognito

PROMISE-P 100% + - [Navigation Icons] DEMO-206220A.svs 8X martin

CANCER

Image size : 85656 x 18994  
File size : 201MB  
File format : svs  
MPP : 0.3



+ -

In-Vitro Diagnostics (v1.1.0)

1326µm

5) The detected cancer lesions are represented as red-colored overlays. It takes less than a minute to analyze a single core image on a decent hardware.



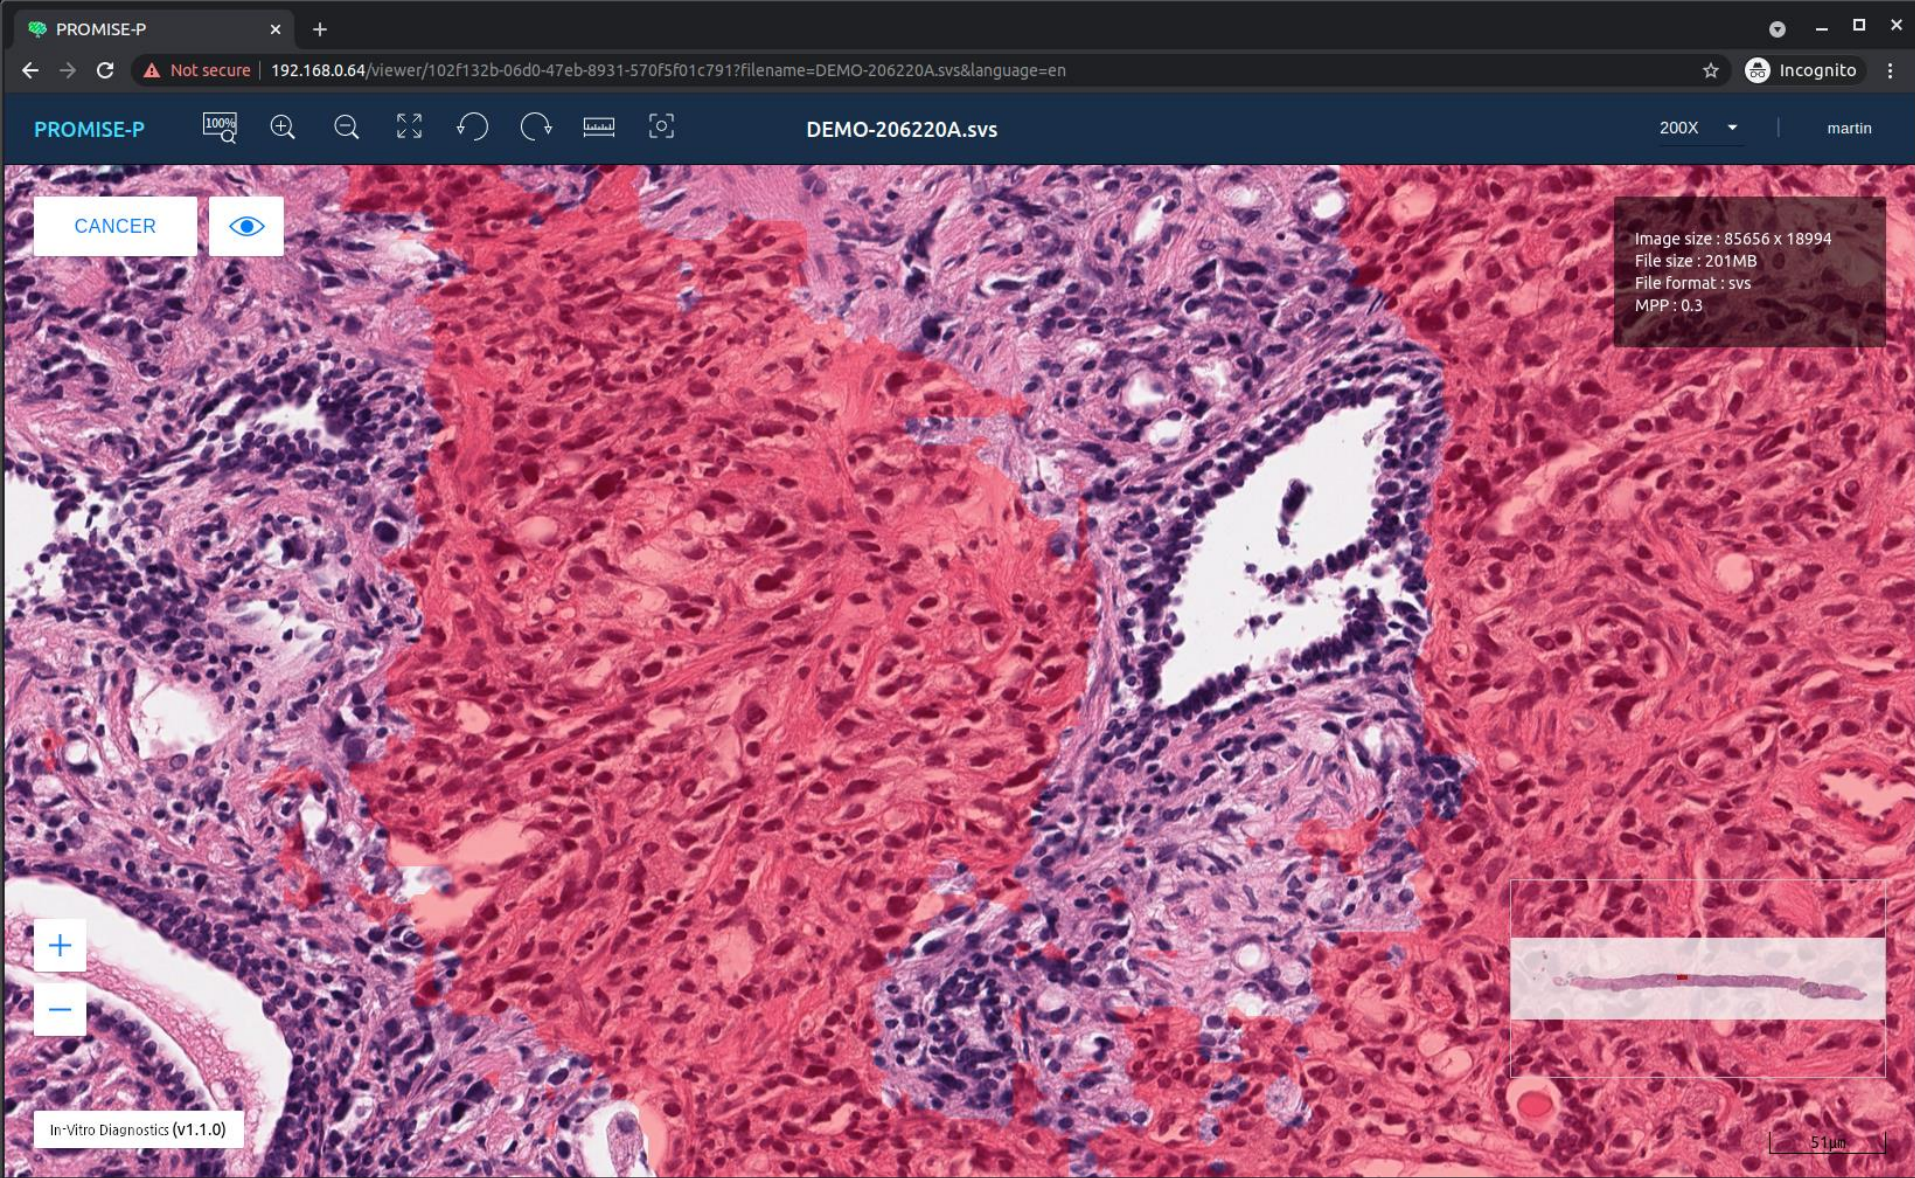

6) The image and cancer lesion overlays are presented in 20x magnification.



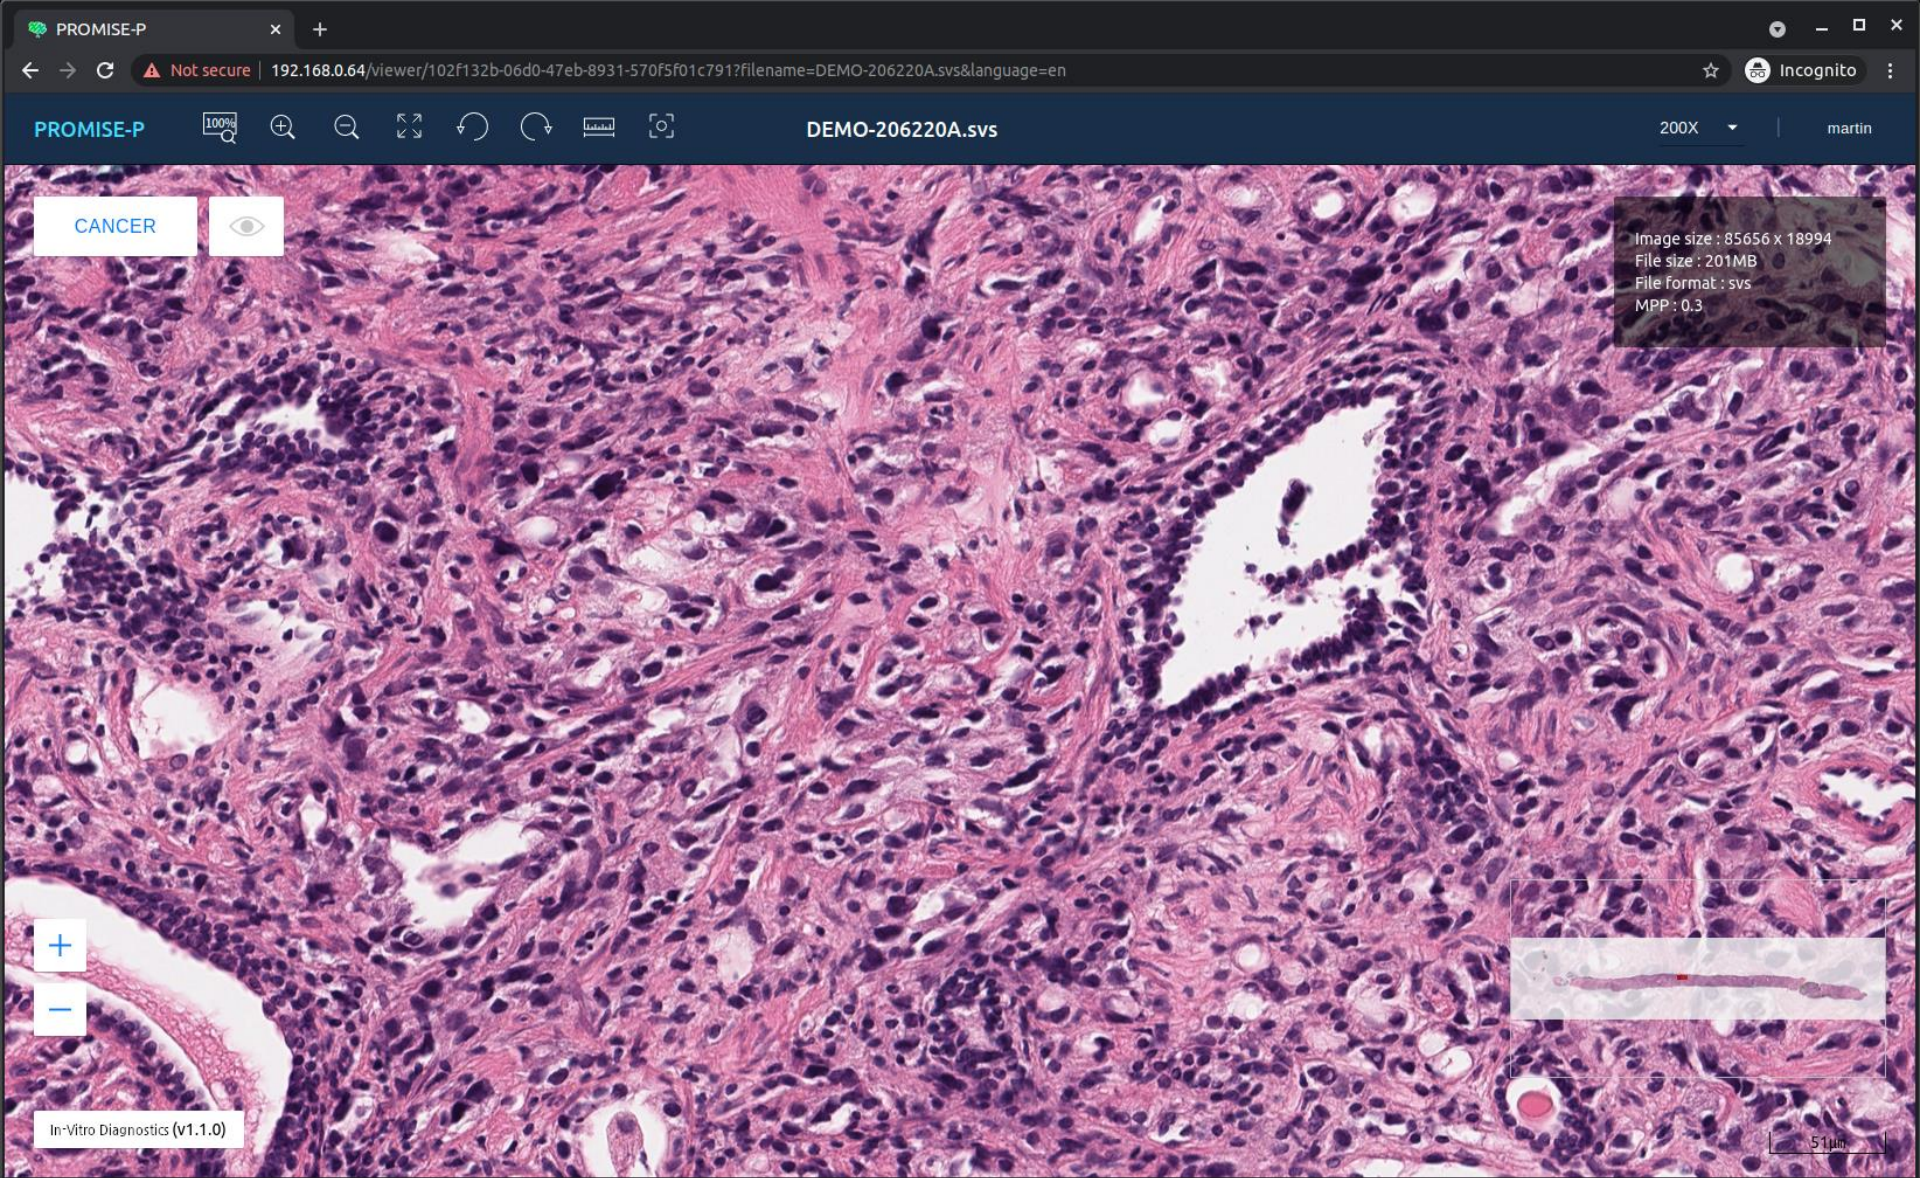

7) The cancer lesion overlays can be hidden by clicking the 'eye' button.



PROMISE-P x +

Not secure | 192.168.0.64/viewer/102f132b-06d0-47eb-8931-570f5f01c791?filename=DEMO-206220A.svs&language=en

Incognito

PROMISE-P 100% + - [Navigation Icons] DEMO-206220A.svs 8X martin

CANCER [Eye Icon]

Image size : 85656 x 18994  
File size : 201MB  
File format : svs  
MPP : 0.3

1814  $\mu\text{m}$

Length : 3491  $\mu\text{m}$   
Total Length : 5305  
ESC : Complete  
Backspace : Cancel  
Panning : Arrow key

+  
-

In-Vitro Diagnostics (v1.1.0)

1326  $\mu\text{m}$

8) Users can measure
